# Supplementary material for: Targeting ulcerative colitis by suppressing glucose uptake with ritonavir
Source: PubMed Central journal article supplement (PMC6262818; doi:10.1242/dmm.036210), 2018-11-21
Supplement: dmm-11-036210-s1.pdf [file dmm-11-036210-s1.pdf]

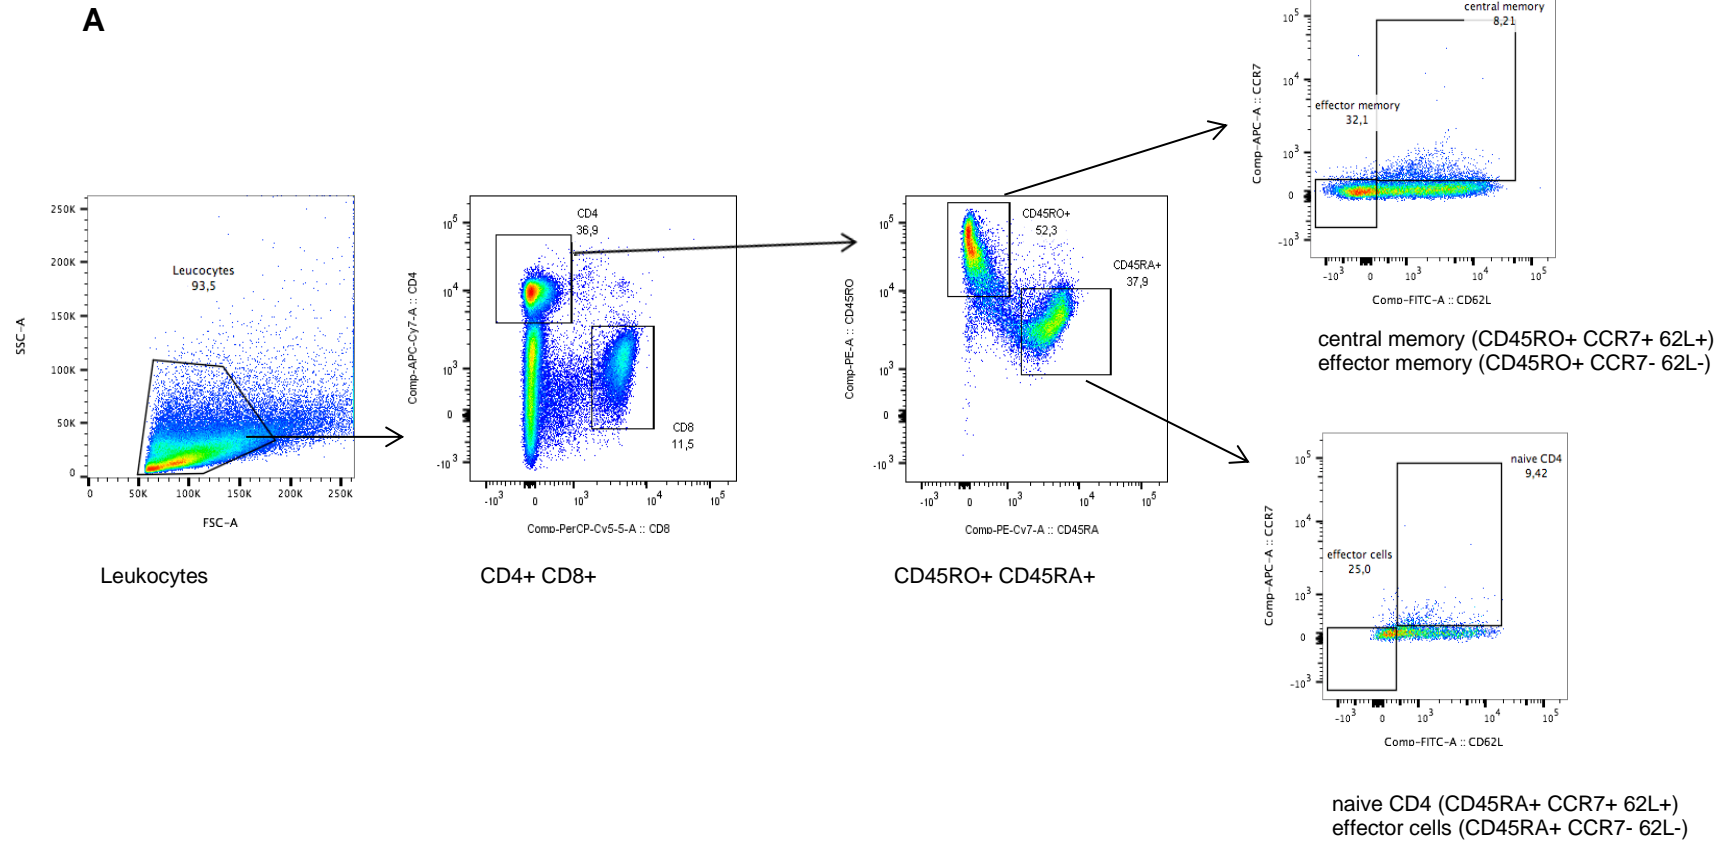

**B**

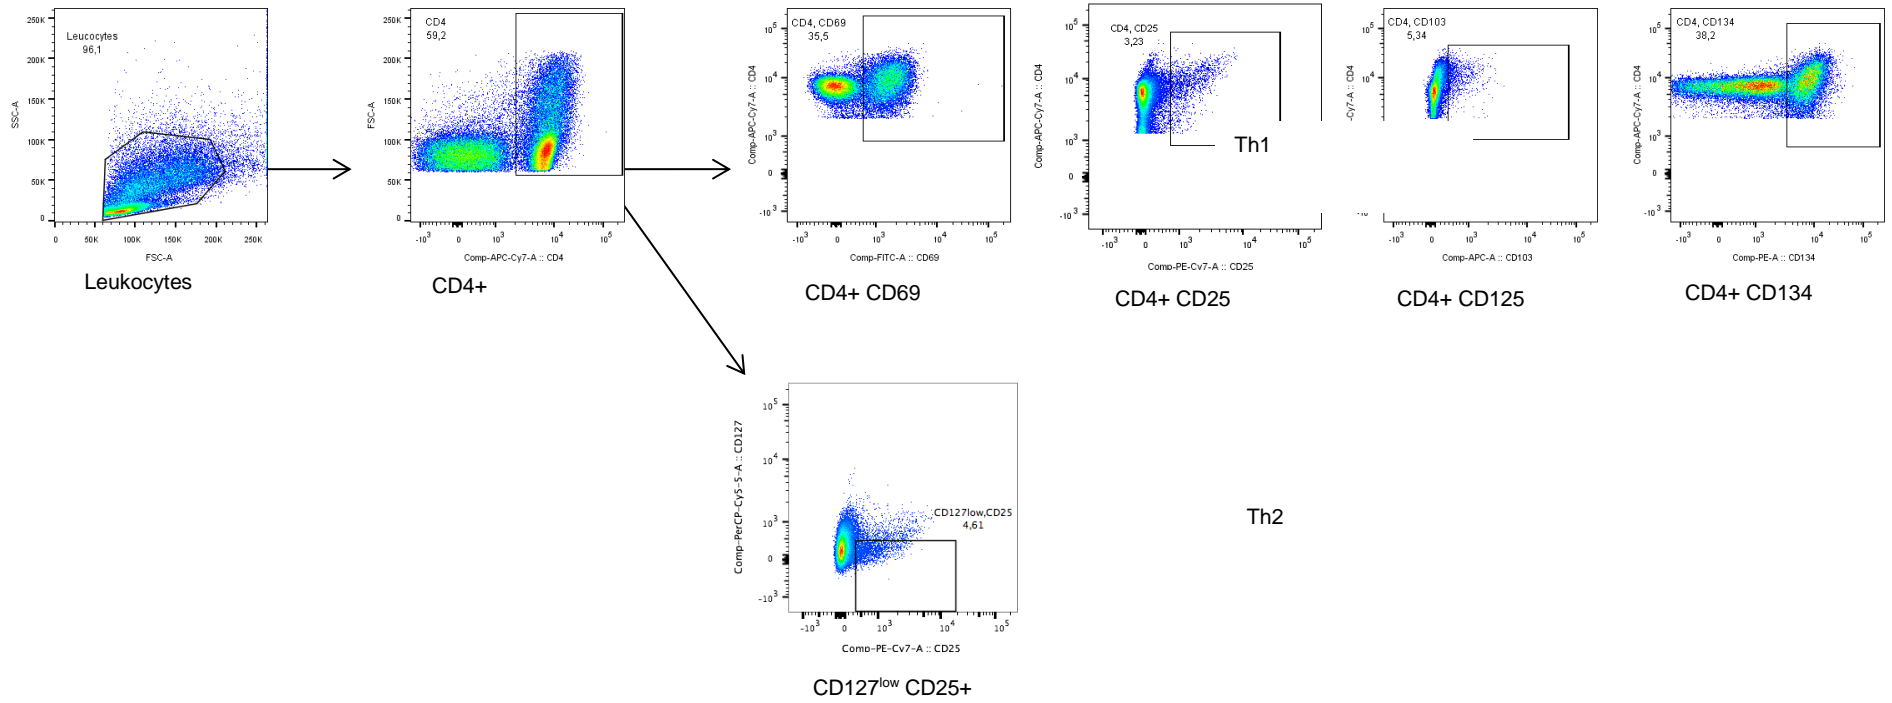

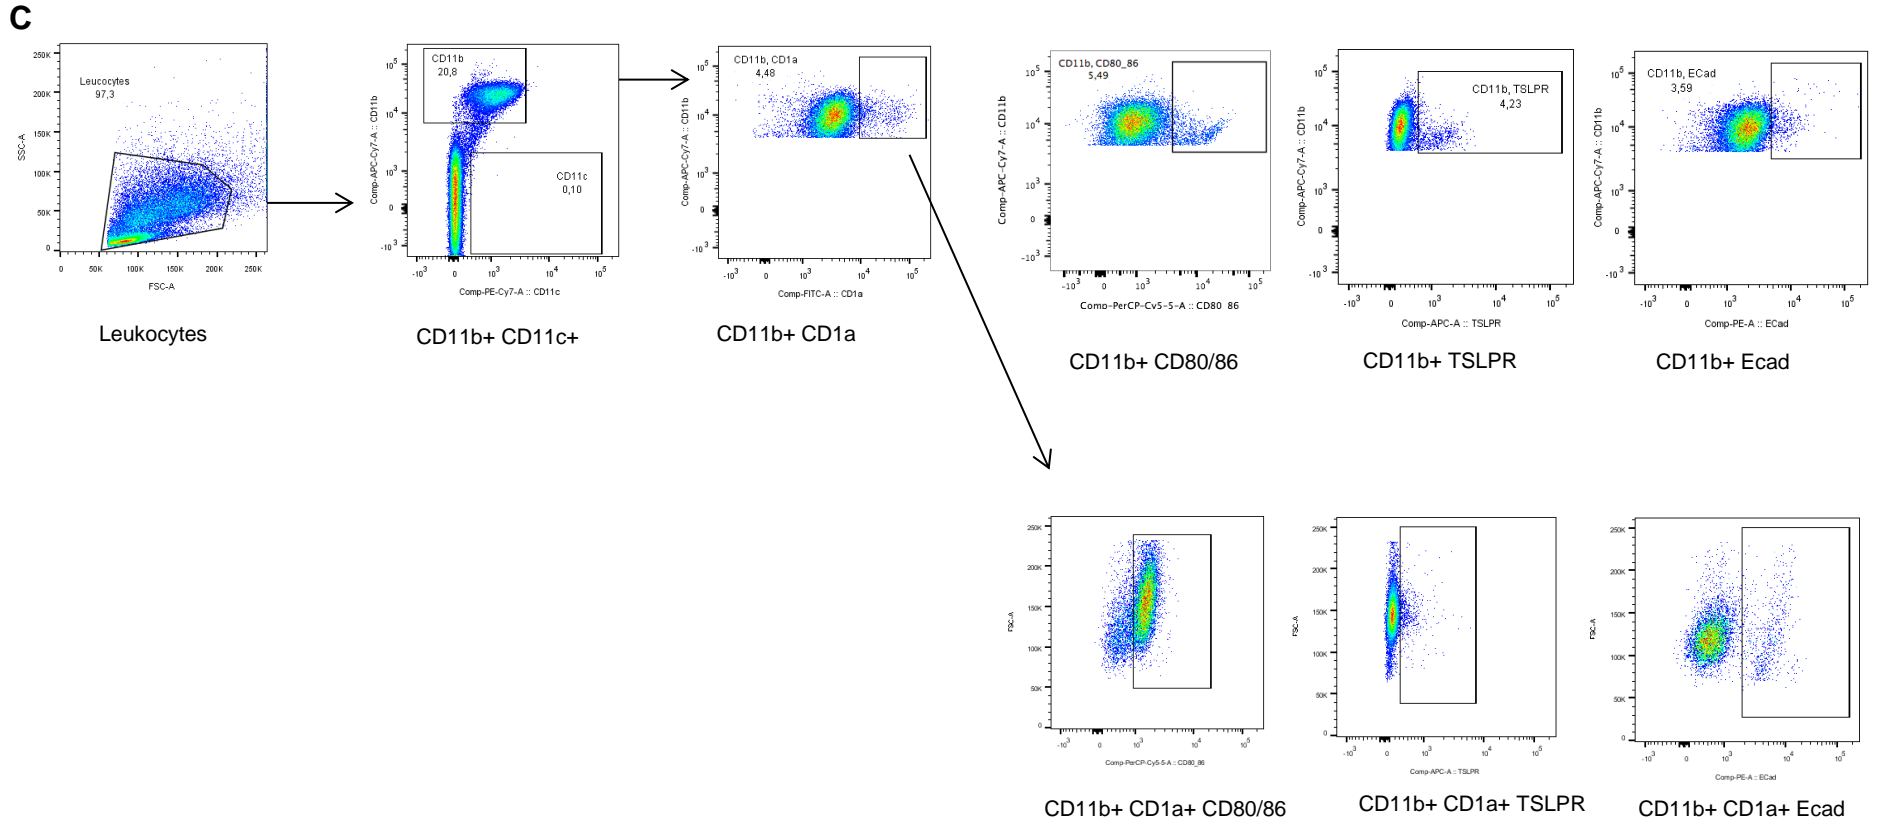

D

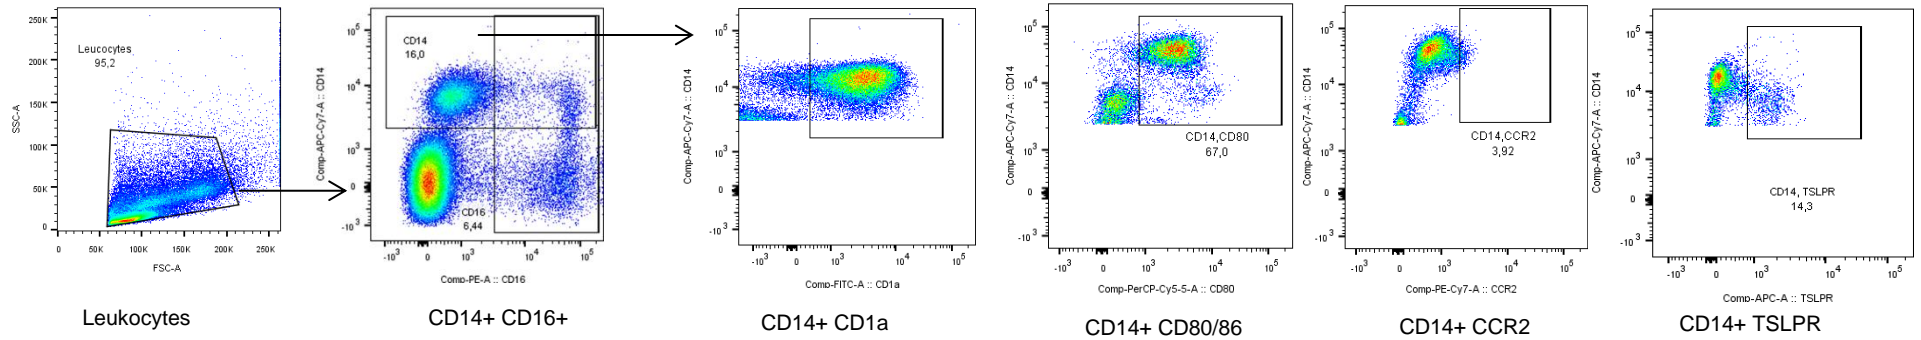

**Figure S1. Gating strategy** (A) central memory, effector memory, naive and effector CD4+ cells; (B) Th1, Th2, Th17 and Th22 T-cells; (C) activated CD4+ T-cells and Tregs; (D) CD11b+ macrophages; (E) CD14+ monocytes. Leukocytes were labeled as described in Material and Methods using antibodies listed in Table S1.

A

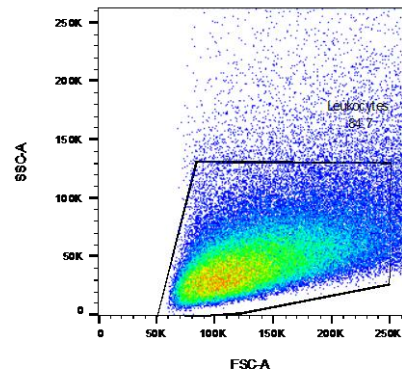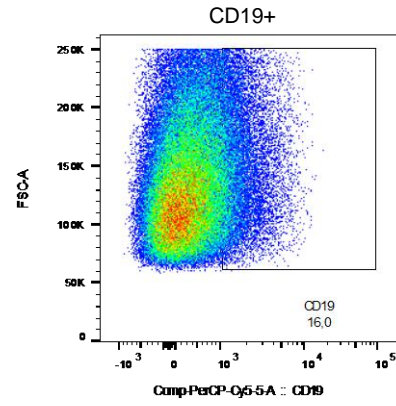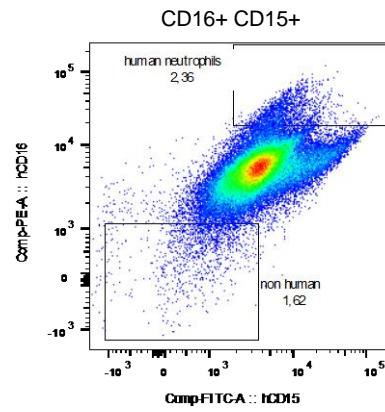

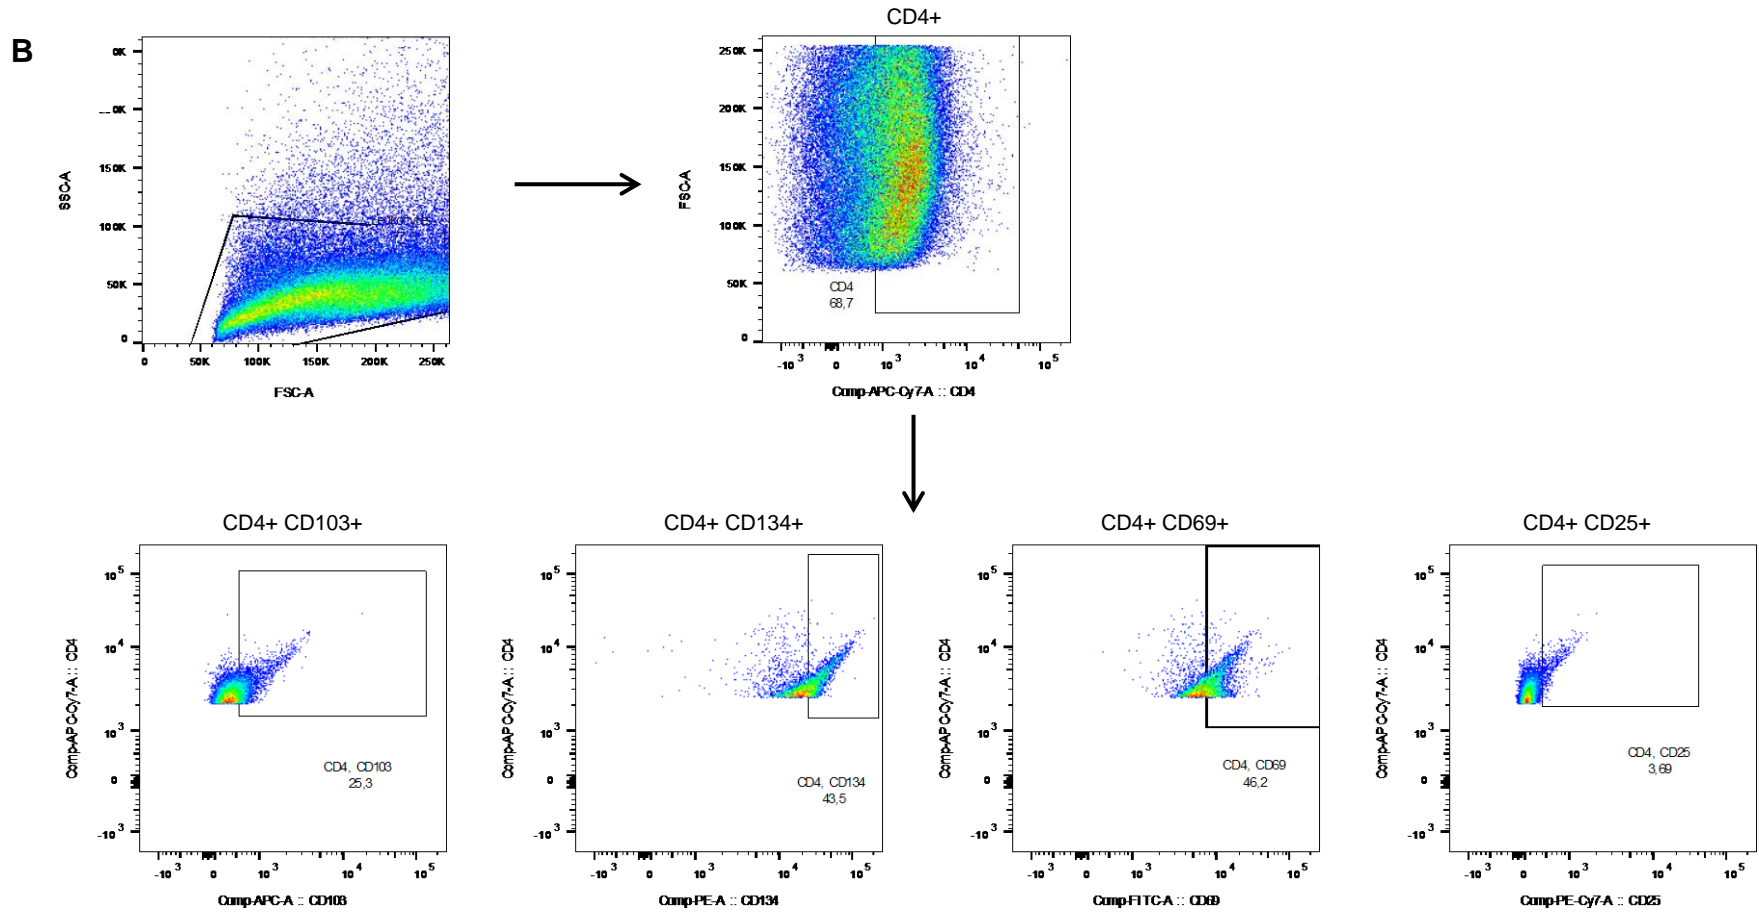

C

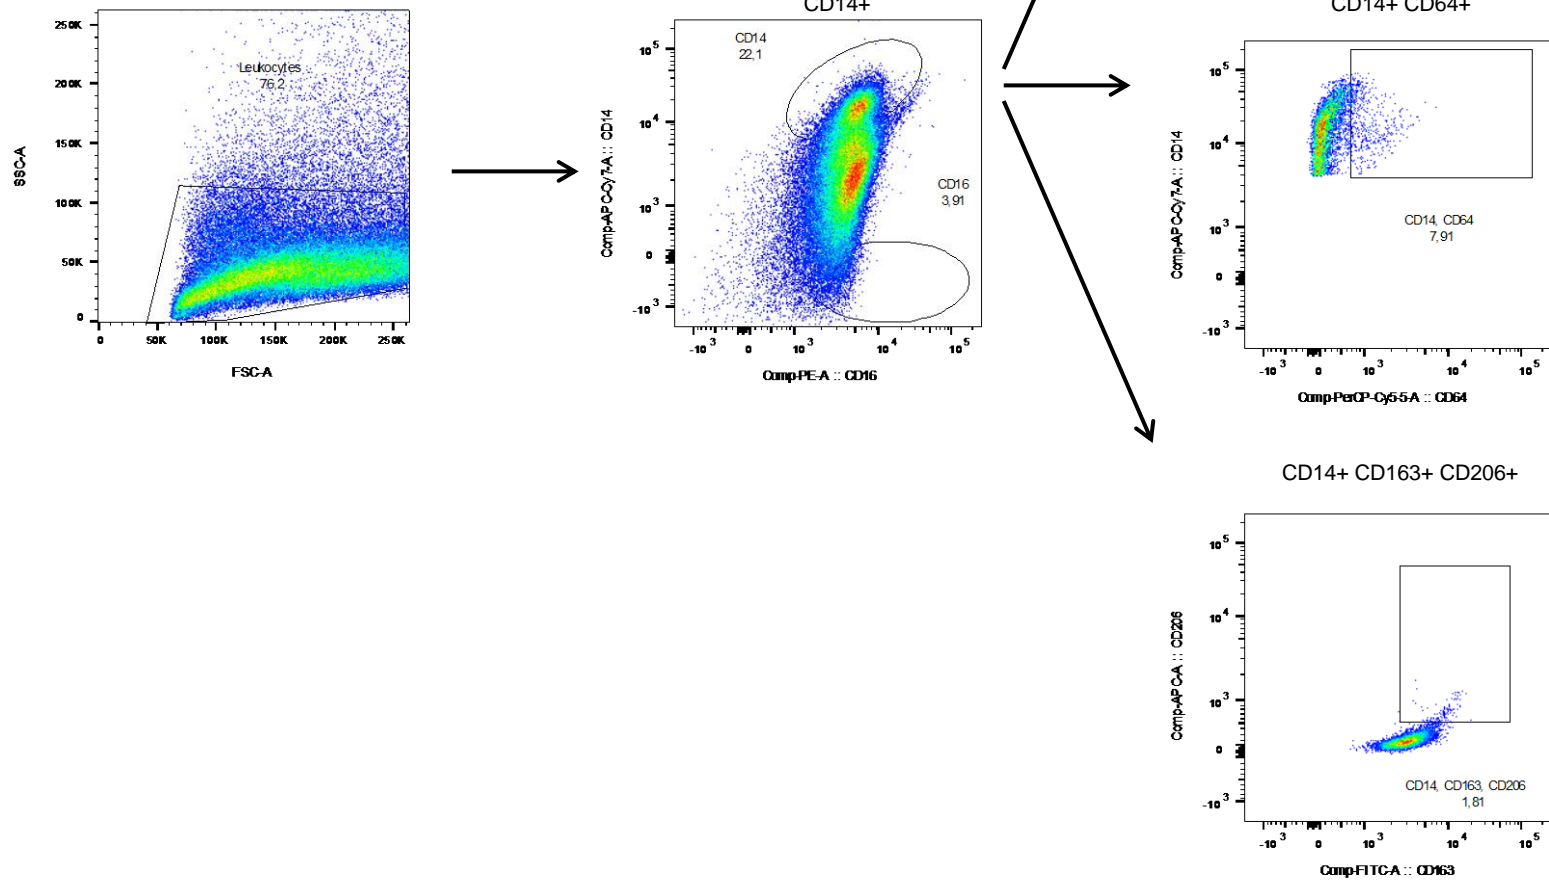

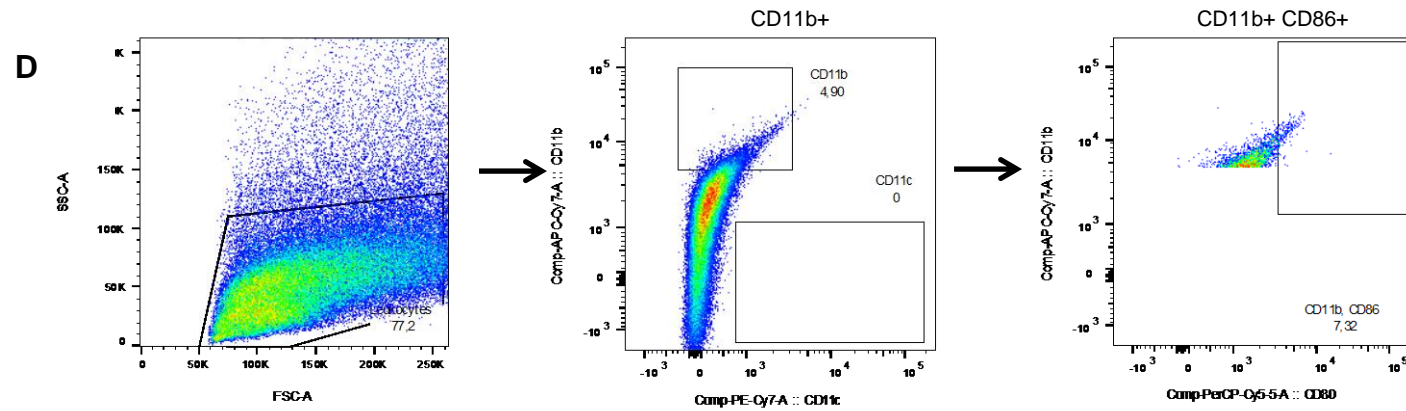

**Figure S2. Gating strategy for leukocytes isolated from colon.** (A) B cells, human neutrophils; (B) activated CD4<sup>+</sup> T-cells; (C) CD14<sup>+</sup> monocytes (D) CD11b<sup>+</sup> macrophages. Leukocytes were labeled as described in Material and Methods using antibodies listed in Table S1.



**Table S1. Antibodies used to label leucocytes**

| Surfacemarker (anti human)              | Colour                                                           | Clone     | Catalogue Number |
|-----------------------------------------|------------------------------------------------------------------|-----------|------------------|
| CD19                                    | Peridine-chlorophyll-protein complex cyanine dye (PerCP-Cy™ 5.5) | HIB19     | 302230           |
| CD38                                    | Phycoerythrin (PE)                                               | HB-7      | 356603           |
| CD27                                    | Pe-Cy7                                                           | M-T271    | 356411           |
| IgD                                     | Fluorescin isothiocyanate (FITC)                                 | IA6-2     | 348217           |
| CD4                                     | Allophycocyanin (APC)- Cy7                                       | OKT4      | 317417           |
| CD62L                                   | FITC                                                             | DREG-56   | 304803           |
| CD45RO                                  | PE                                                               | UCHL1     | 304205           |
| CD45RA                                  | Pe-Cy7                                                           | HI100     | 304125           |
| CCR7                                    | APC                                                              | G043H7    | 353213           |
| CD8                                     | PerCP-Cy™ 5.5                                                    | HIT8a     | 300923           |
| CD103                                   | APC                                                              | Ber-ACT8  | 350215           |
| CD25                                    | PE-Cy7                                                           | BC96      | 302611           |
| CD14                                    | APC-Cy7                                                          | HCD14     | 325619           |
| CCR2                                    | PE-Cy7                                                           | K036C2    | 357211           |
| CD80/86                                 | PerCP-Cy™ 5.5                                                    | IT2.2     | 305419           |
| TSLPR*                                  | APC                                                              | 1B4       | 322807           |
| CD1a (biotin)/secondary Ab streptavidin | FITC                                                             | HI149     | 300112           |
| CD64                                    | PerCP-Cy™ 5.5                                                    | 10.1      | 305023           |
| CD163                                   | FITC                                                             | GHI/61    | 333617           |
| CD206                                   | APC                                                              | 15-2      | 321109           |
| CD16                                    | PE                                                               | 3G8       | 302007           |
| CD11b                                   | APC-Cy7                                                          | ICRF44    | 301341           |
| CD11c                                   | PE-Cy7                                                           | 3.9       | 301607           |
| ECad                                    | PerCP-Cy™ 5.5                                                    | 67A4      | 324105           |
| CD127                                   | PerCP-Cy™ 5.5                                                    | A019D5    | 351321           |
| CD69                                    | FITC                                                             | FN50      | 310903           |
| CD134 (Ox40)                            | PE                                                               | Ber-ACT35 | 350003           |
| CXCR3                                   | FITC                                                             | G025H7    | 353703           |
| CCR4                                    | PE                                                               | L291H4    | 359411           |
| CCR6                                    | PE-Cy7                                                           | G034E3    | 353417           |
| CCR10                                   | APC                                                              | 6588-5    | 341505           |

\* Thymic stromal lymphopoietin receptor

**Table S2. Cellular markers used to define immune cells**

| Marker                     | Definition                          |
|----------------------------|-------------------------------------|
| CD19+ CD27+ IgD+           | Unswitched memory B-cell            |
| CD19+ CD27+ IgD-           | Switched memory B-cell              |
| CD19+ CD38+                | Plasma cell                         |
|                            |                                     |
| CD4+ CD45RO+ CD62L- CCR7-  | Effector memory CD4+ T- cell        |
| CD4+ CD45RO+ CD62L+, CCR7+ | Central memory                      |
| CD4+ CD103+                | Mucosal regulatory CD4+ T cell      |
| CD4+ CCR4+                 | Th2, effector regulatory T- cell    |
| CD4+ CD25+ CD127-          | Regulatory T-cell                   |
|                            |                                     |
| CD4+ CD134+                | Activated CD4+ T cell               |
| CD4+ CD69+                 | Activated CD4+ T cell               |
| CD4+ CD25+                 | Activated CD4+ T cell               |
|                            |                                     |
| CD14+                      | Monocytes (MC)                      |
| CD14+ TSLPR*+              | MC, expressing TSLPR                |
| CD14+ CD64+                | M1MC                                |
| CD14+ CD163+ CD206+        | M2 MC, scavenging cells             |
| CD14+ CD1a                 | MC CD1a expressing                  |
| CD11b+                     | Conventional dendritic cells (cDC1) |
| CD11b+ CD80/86+            | cDC1, mature                        |
| CD11b+ HLADR+              | cDC1, presenting                    |
| CD11b+ TSLPR*+             | cDC1 TSLPR expressing               |
| CD11b+ CD1a+               | cDC1 CD1a expressing                |

\* Thymic stromal lymphopoietin receptor

**Table S3. Complete data set from *in vitro* studies**

[Click here to Download Table S3](#)

**Table S4. Complete data set from animal study**

[Click here to Download Table S4](#)

**Table S5. Complete data set from animal study testing ritonavir**

[Click here to Download Table S5](#)

**Table S6.**

[Click here to Download Table S6](#)
